# Supplementary material for: Current and future rainfall-driven flood risk from hurricanes in Puerto Rico under 1.5 and 2 °C climate change
Source: Copernicus journal article supplement (doi:10.5194/nhess-24-375-2024), 2024-02-05
Supplement: Supplementary file 1 [file nhess-24-375-2024-supplement.pdf]

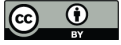

*Supplement of*

## **Current and future rainfall-driven flood risk from hurricanes in Puerto Rico under 1.5 and 2 °C climate change**

**Leanne Archer et al.**

*Correspondence to:* Leanne Archer ([leanne.archer@bristol.ac.uk](mailto:leanne.archer@bristol.ac.uk))

The copyright of individual parts of the supplement might differ from the article licence.

# Supplement

## Contents

Text S1

Table S1

Figures S1-S2

## Introduction

In this Supporting Information file, further information on the assessment of the High Water Mark (HWM) data is provided in accompaniment to Section 2.4 and 3.1.

### **Additional Description of the High Water Mark Selection – Text S1**

The LiDAR 1m ground elevation, plus the USGS-measured flood water depth for each HWM were taken to calculate the observed water surface elevation. The original USGS-measured HWM ground elevation was not used, as on assessment these values were considerably different to the LiDAR heights. One reason for this could be that the dominant method of terrain elevation measurement was handheld GPS or the use of map contours, leading to lower accuracy, although this will not affect the absolute water depths. The original USGS-measured HWM height was converted to metres and to the EGM96 geoid to match the flood model datum using VDatum.

When all riverine HWMs (n=149) were included in the analysis comparing all events with the HWMs, there were 24 (16%) extreme outliers (>+4m) identified across the four climate models. Two main reasons for this were found on inspection of the satellite imagery and the 1m and 20m LiDAR elevations at each HWM location. The satellite imagery used was (ESRI, 2023) (ArcGIS/World Imagery) at 0.5m resolution, as this was readily available for comparison with the HWMs in GIS applications. First, as a result of LiDAR resampling from 1m to 20m, the elevation of areas which were on the boundary of high/low topographic areas and near riverbeds were aggregated during the resampling. This led to different elevations in the 20m LiDAR compared to the 1m LiDAR and thus an over or under prediction of water surface elevation. If the event set was run again at a finer resolution, model performance at these locations would be likely to improve, as has previously been noted in other studies (Fewtrell et al., 2011; Neal et al., 2009). Secondly, the model both under- and over-predicted water surface elevations compared to the HWMs in areas close to bridges. In some locations bridges had been removed from the LiDAR, whilst other points still had bridges evident in the terrain data. Future analysis could investigate how the inclusion or removal of bridges leads to under or over prediction in the model.

**High Water Mark Error Assessment – Table S1**

| <b>Point ID</b> | <b>Model prediction</b> | <b>HWM ground elevation (m)</b> | <b>LiDAR 1m elevation (m)</b> | <b>LiDAR 20m model elevation (m)</b> | <b>Check against satellite imagery</b> | <b>Reasons for outliers</b>                                                                                                                                            |
|-----------------|-------------------------|---------------------------------|-------------------------------|--------------------------------------|----------------------------------------|------------------------------------------------------------------------------------------------------------------------------------------------------------------------|
| 5               | Under                   | 49.52                           | 48.17                         | 46.04                                | No clear reason                        | High Water Mark quality marked as 'fair'. Due to DEM resampling, the 20m LiDAR includes higher areas whereas the point is just on the boundary of a higher/lower area. |
| 8               | Under                   | 4.71                            | 3.37                          | 3.88                                 | Near river                             | Due to DEM resampling, the 20m LiDAR includes lower values associated with the riverbed.                                                                               |
| 9               | Under                   | 5.57                            | 5.13                          | 5.48                                 | No clear reason                        | No clear reason.                                                                                                                                                       |
| 27              | Under                   | 44.05                           | 53.59                         | 53.57                                | Near bridge                            | High Water Mark quality marked as 'fair'. Near bridge.                                                                                                                 |
| 39              | Under and some over     | 200.21                          | 199.18                        | 198.87                               | Near bridge and river                  | High Water Mark quality marked as 'fair'. Near bridge.                                                                                                                 |
| 52              | Over                    | 8.45                            | 6.49                          | 5.35                                 | Near bridge and stream                 | Due to DEM resampling, the 20m LiDAR includes lower values associated with the riverbed. Near bridge.                                                                  |
| 57              | Over                    | 182.57                          | 180.97                        | 181                                  | No clear reason                        | High Water Mark quality marked as 'fair'.                                                                                                                              |
| 59              | Over                    | 182.71                          | 181.09                        | 179.6                                | No clear reason                        | No clear reason.                                                                                                                                                       |
| 62              | Over and some under     | 13.91                           | 12.09                         | 18.36                                | No clear reason                        | Due to DEM resampling, the 20m LiDAR includes higher areas whereas the point is just on the boundary of a higher/lower area.                                           |

|     |                     |        |        |        |                              |                                                                                                                                                                        |
|-----|---------------------|--------|--------|--------|------------------------------|------------------------------------------------------------------------------------------------------------------------------------------------------------------------|
| 63  | Over and some under | 13.75  | 11.40  | 18.36  | No clear reason              | Due to DEM resampling, the 20m LiDAR includes higher areas whereas the point is just on the boundary of a higher/lower area.                                           |
| 76  | Under               | 194.54 | 192.36 | 192.29 | Near bridge and river        | High Water Mark quality marked as 'fair'. Due to DEM resampling, the 20m LiDAR includes lower values associated with the riverbed. Near bridge.                        |
| 79  | Under               | 12.07  | 9.67   | 9.98   | No clear reason              | HWM elevation higher than LiDAR.                                                                                                                                       |
| 81  | Under and some over | 12.96  | 13     | 14.51  | No clear reason              | High Water Mark quality marked as 'poor'. Due to DEM resampling, the 20m LiDAR includes higher areas whereas the point is just on the boundary of a higher/lower area. |
| 83  | Over                | 188.82 | 187.06 | 187.59 | Near bridge                  | Near bridge.                                                                                                                                                           |
| 84  | Under               | 181.45 | 179.85 | 178.48 | Close to bridge              | High Water Mark quality marked as 'fair'.                                                                                                                              |
| 89  | Over                | 150.60 | 150.12 | 147.98 | Proximity to river.          | Due to DEM resampling, the 20m LiDAR includes lower values associated with the riverbed.                                                                               |
| 115 | Under               | 36     | 33.72  | 32.68  | No clear reason              | No clear reason.                                                                                                                                                       |
| 124 | Under               | 14.27  | 11.59  | 11.22  | Near bridge and river        | Near bridge.                                                                                                                                                           |
| 125 | Under               | 15.64  | 13.83  | 14.53  | No clear reason              | High Water Mark quality marked as 'fair'.                                                                                                                              |
| 129 | Over                | 57.35  | 56.05  | 55.71  | Near bridge and small stream | Near bridge.                                                                                                                                                           |
| 132 | Under               | 10.83  | 10.14  | 10.11  | Near bridge                  | Near bridge.                                                                                                                                                           |
| 138 | Over                | 61.78  | 60.93  | 60.81  | Near river                   | Due to DEM resampling, the 20m LiDAR includes lower values associated with the riverbed.                                                                               |
| 143 | Over                | 14.23  | 13.12  | 13.65  | No clear reason              | No clear reason.                                                                                                                                                       |
| 147 | Under               | 13.29  | 11.77  | 12.52  | Near pond                    | Due to DEM resampling, the 20m LiDAR includes lower values associated with the nearby pond.                                                                            |

**Table S1.** Table showing the outliers with error  $> \pm 4\text{m}$  comparing observed High Water Mark water surface elevations for Hurricane Maria with modelled water surface elevations. For each outlier, the elevations of the original USGS ground elevation, and the LiDAR ground elevations at 1m and 20m, are compared. Satellite imagery is also used to identify any features in the surrounding area which may lead to error, such as bridges and other topographical features. For each outlier point, the key reason leading to error is identified and noted in the table.

### High Water Mark Locations – Figure S1

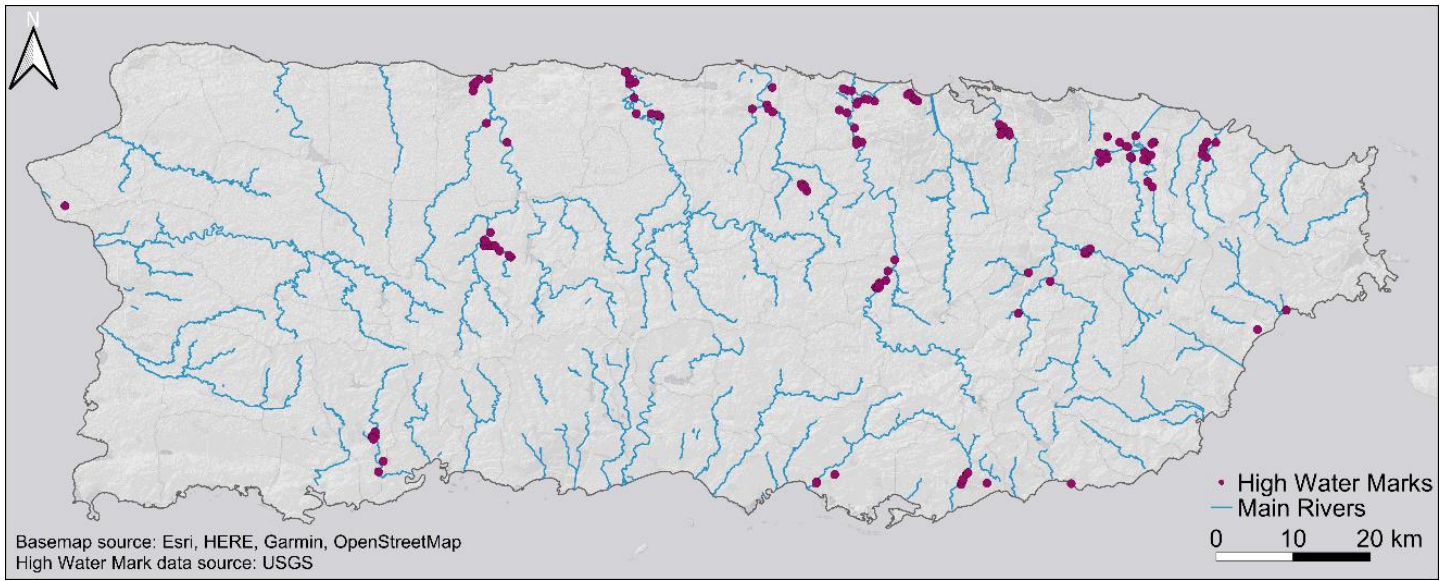

**Figure S1.** Figure showing the location of all riverine High Water Mark locations associated with Hurricane Maria (n=149), collected by USGS and available here: <https://stn.wim.usgs.gov/FEV/#MariaSeptember2017>

**Hurricane Maria-like Events Track Locations – Figure S2**

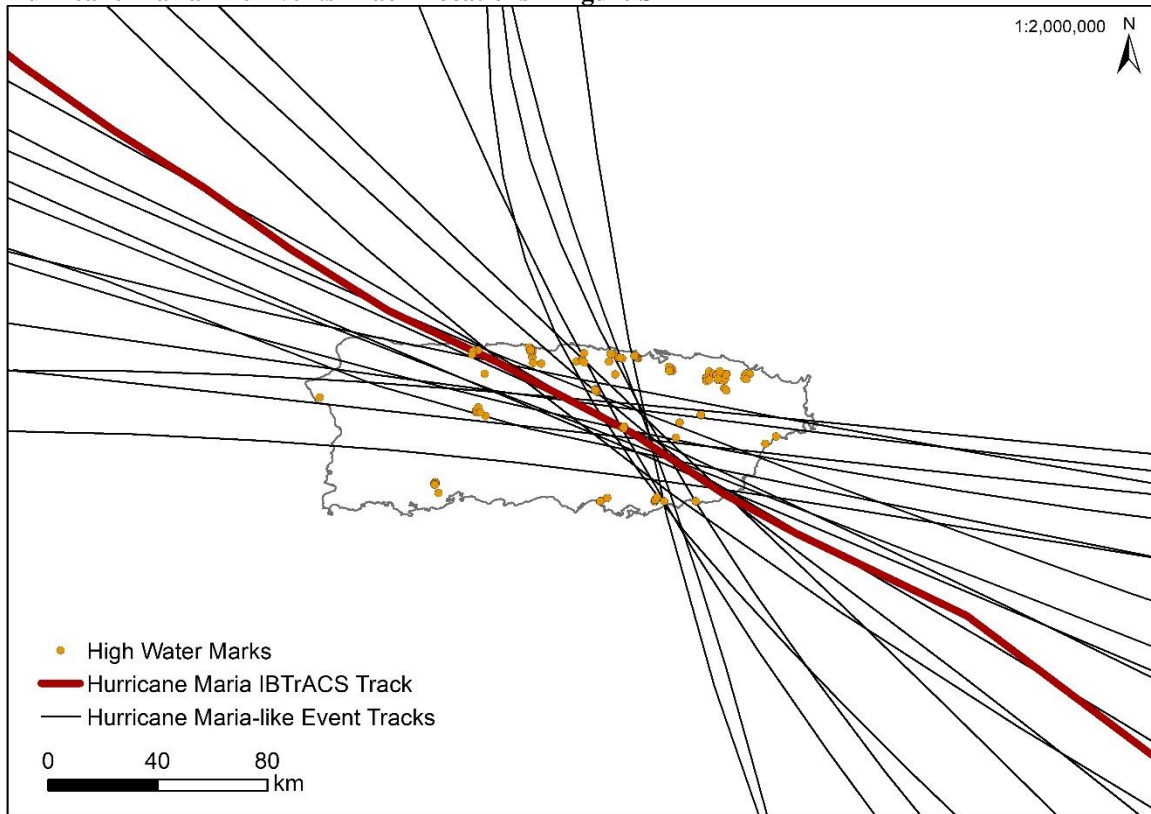

**Figure S2.** Figure showing the track locations of the events selected as Maria-like in the event set (20 events) in comparison to the Hurricane Maria track from IBTrACS across Puerto Rico. The map also shows the locations of the High Water Marks from Hurricane Maria, which the flood depths in each event are compared to.

## References

- ESRI. (2023). World Imagery - Overview. Retrieved November 3, 2023, from <https://www.arcgis.com/home/item.html?id=10df2279f9684e4a9f6a7f08febac2a9#!>
- Fewtrell, T. J., Duncan, A., Sampson, C. C., Neal, J. C., & Bates, P. D. (2011). Benchmarking urban flood models of varying complexity and scale using high resolution terrestrial LiDAR data. *Physics and Chemistry of the Earth*, 36(7–8), 281–291. <https://doi.org/10.1016/j.pce.2010.12.011>
- Neal, J. C., Bates, P. D., Fewtrell, T. J., Hunter, N. M., Wilson, M. D., & Horritt, M. S. (2009). Distributed whole city water level measurements from the Carlisle 2005 urban flood event and comparison with hydraulic model simulations. *Journal of Hydrology*, 368(1–4), 42–55. <https://doi.org/10.1016/j.jhydrol.2009.01.026>
